# Supplementary material for: VN@C hollow structures derived from ZIF-8 templates for a lithium-ion battery anode
Source: Royal Society of Chemistry journal article supplement (doi:10.1039/d3ce00049d), 2023-01-01
Supplement: d3ce00049d1.pdf [file d3ce00049d1.pdf]

## Supporting Information

### **VN@C Hollow Structures Derived from ZIF-8 Templates for Lithium-Ion Battery Anode**

Keke Zhu<sup>a</sup>, Yunpeng Zhang<sup>a</sup>, Ranran Jiao<sup>b,c</sup>, Yanjun Zhai<sup>a</sup>, Denghu Wei<sup>d</sup>, Suyuan Zeng<sup>\*a</sup> and Lei Wang<sup>\*a</sup>

<sup>a</sup>School of Chemistry and Chemical Engineering, Liaocheng University  
Liaocheng, 252059, PR China.

<sup>b</sup>CAS Key Laboratory of Photovoltaic and Energy Conservation Materials, Institute of Plasma Physics,  
Hefei Institutes of Physical Science, Chinese Academy of Sciences,  
Hefei, Anhui 230031, PR China

<sup>c</sup>University of Science and Technology of China, Hefei, Anhui 230026, PR China

<sup>d</sup>School of Materials Science and Engineering, Liaocheng University  
Liaocheng, 252059, PR China.

E-mail: drzengsy@163.com (S. Zeng), wanglei@lcu.edu.cn (L. Wang)

Tel: +86-635-8230614, Fax: +86-635-8230196

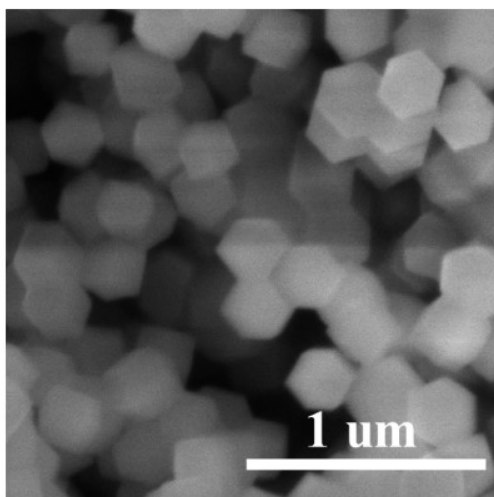

Fig. S1 SEM image of as-prepared ZIF-8.

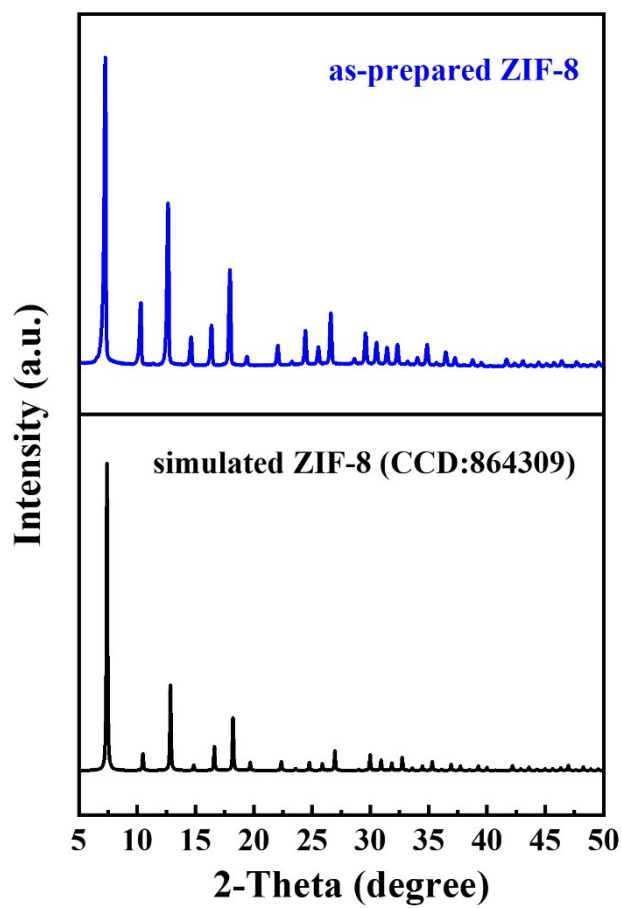

Fig. S2 XRD pattern of as-prepared ZIF-8.

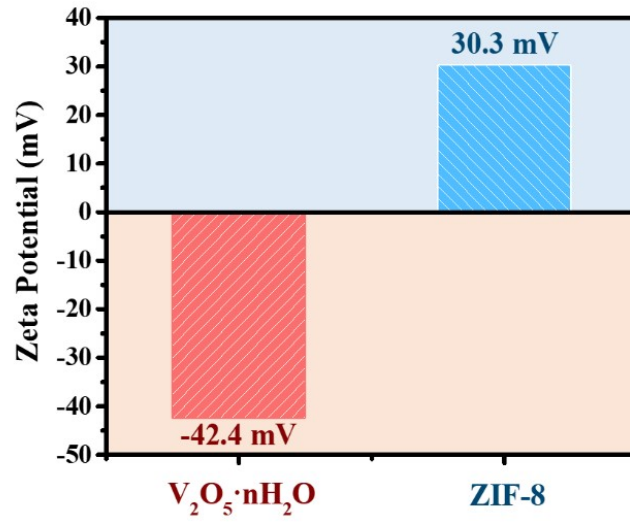

Fig. S3 Zeta potential of  $V_2O_5 \cdot nH_2O$  colloidal particles and ZIF-8.

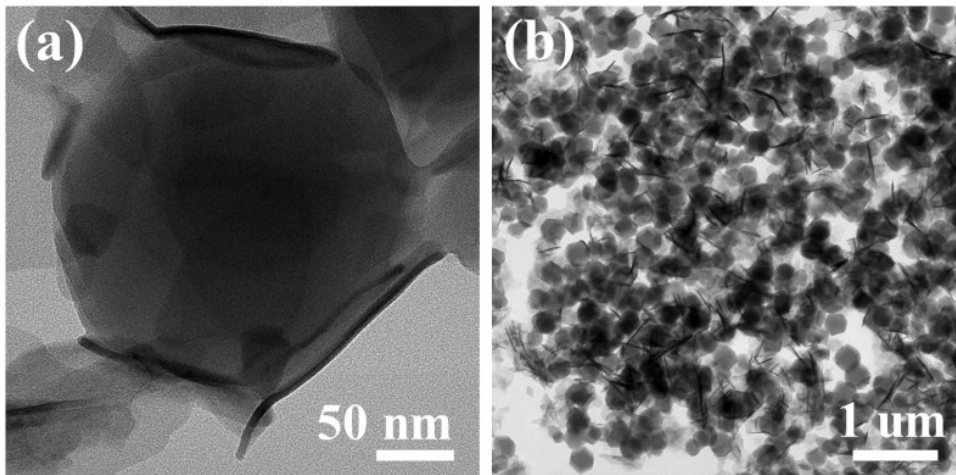

Fig. S4 (a, b) TEM images of  $V_2O_5@ZIF-8$ .

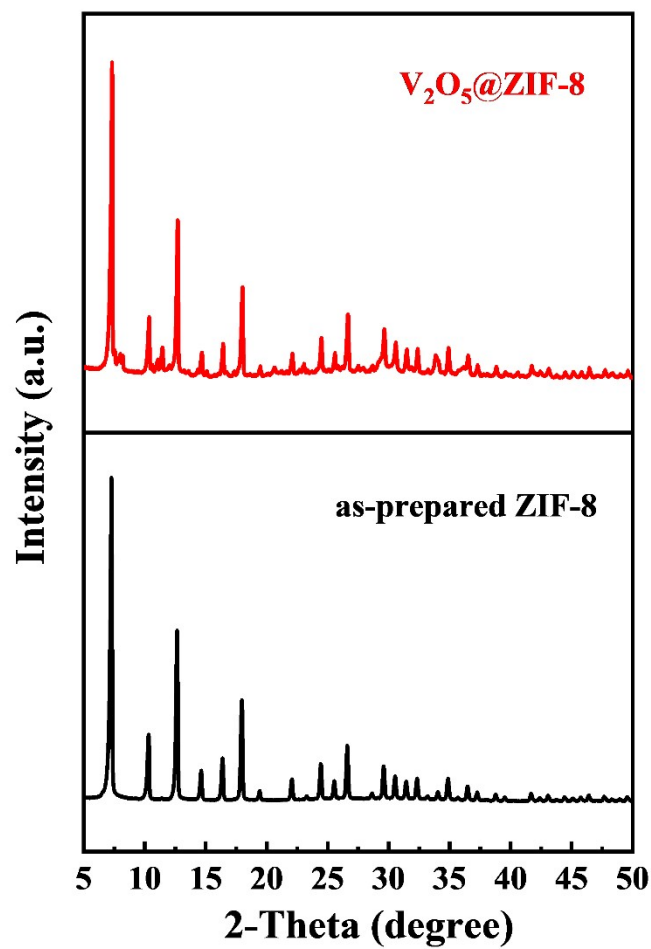

Fig. S5 XRD pattern of  $V_2O_5@ZIF-8$ .

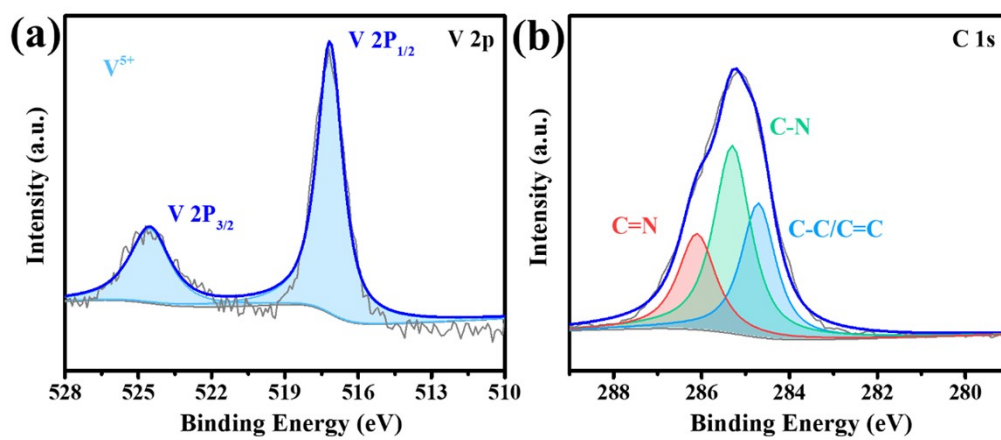

Fig. S6 High-resolution XPS spectra of the (a) V 2p; (b) C 1s of the  $V_2O_5@ZIF-8$ .

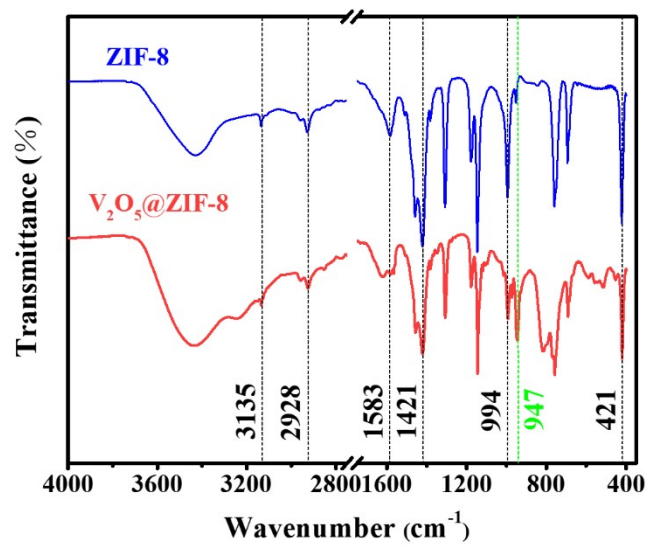

Fig. S7 FT-IR spectra of ZIF-8 and  $V_2O_5@ZIF-8$ .

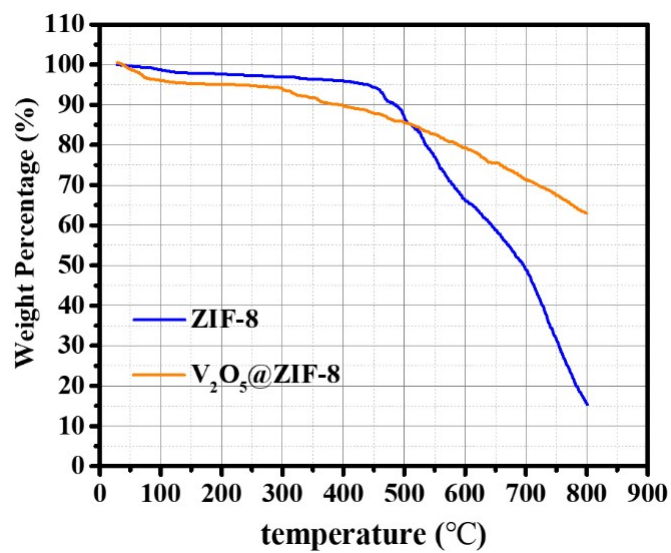

Fig. S8 TGA of ZIF-8 and  $V_2O_5@ZIF-8$  in vacuum.

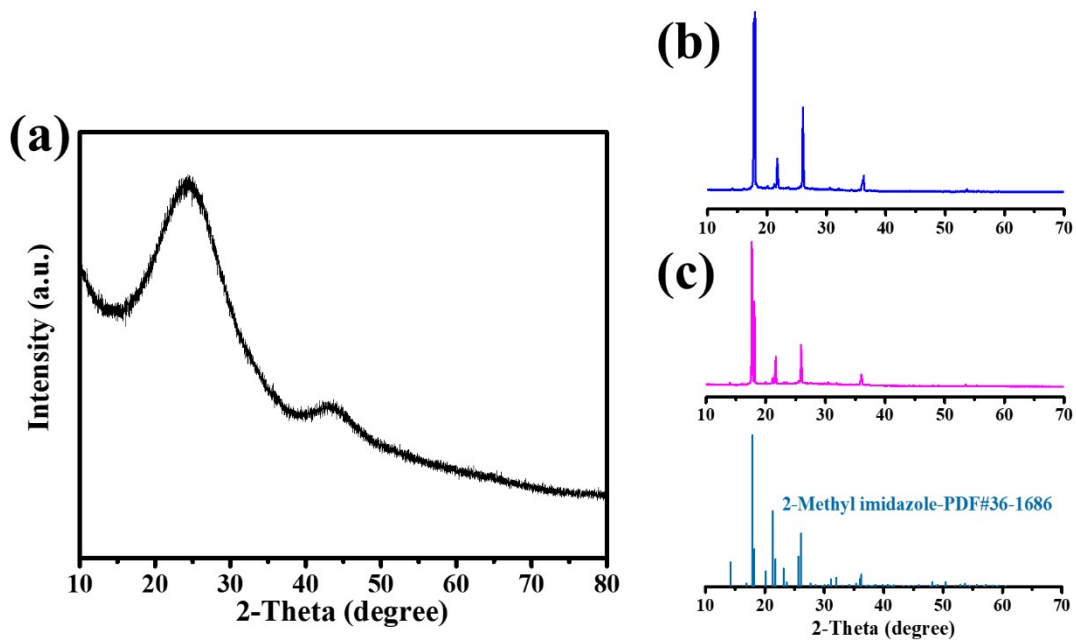

Fig. S9 XRD pattern of the product of (a-b) ZIF-8 and (c) V<sub>2</sub>O<sub>5</sub>@ZIF-8 after TGA.

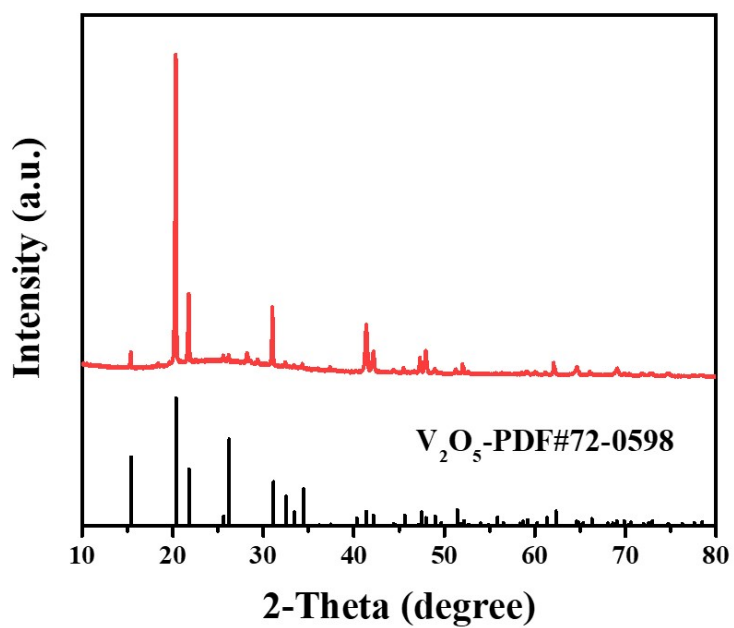

Fig. S10 XRD pattern of the product of VN@C hollow structures at 800 °C under air.
